# Supplementary material
Source: PubMed Central journal article supplement (PMC7512130)
Supplement: jamacardiol-e204297-s002.pdf [file jamacardiol-e204297-s002.pdf]

## **Data Sharing Statement**

Wintzer-Wehekind. Effect of Clopidogrel and Aspirin vs Aspirin Alone on Migraine Headaches After Transcatheter Atrial Septal Defect Closure. *JAMA Cardiol*. Published September 23, 2020.  
10.1001/jamacardio.2020.4297

### **Data**

**Data available:** No
